# Supplementary material for: Hereditable variants of classical protein tyrosine phosphatase genes: Will they prove innocent or guilty?
Source: Front Cell Dev Biol. 2023 Jan 23;10:1051311. doi: 10.3389/fcell.2022.1051311 (PMC9900141; doi:10.3389/fcell.2022.1051311)
Supplement: Supplementary file 1 [file Table1.XLSX]

## Sheet: full_table (2)
external_gene_name	snp_list	translation_start	ensembl_peptide_allele	prot_anno	consequence_type_tv	sift_prediction	polyphen_prediction	ref_aa	alt_aa	literature	PMID	Kolom1
PSMF1	rs79465651	192	V/A	V192A	missense_variant	tolerated	benign	V	A	guilty	31585107	FALSE
PTPN13	rs10033029	1356	F	F1356F/L	synonymous_variant/missense_variant			F	F	innocent		FALSE
PTPN1	rs16989673				3_prime_UTR_variant					guilty		FALSE
PTPRG	rs1010410				intron_variant					innocent		FALSE
PTPN14	rs142697907				intron_variant					guilty	27485598	FALSE
PTPN14	rs2936017				intron_variant					guilty	22233626	FALSE
PTPN14	rs2936018				intron_variant					guilty	22233626	FALSE
PTPN14	rs3002297				intron_variant					guilty	22233626	FALSE
PTPRQ	rs10778752	645	V/D	V645D/A/G	missense_variant	deleterious/tolerated/deleterious	probably damaging/benign/benign	V	D	innocent		FALSE
PTPN14	rs3002300				intron_variant					guilty	22233626	FALSE
PTPN2	rs1893217				intron_variant					guilty	34623320	FALSE
PTPN2	rs2847297				intron_variant					guilty		FALSE
PTPN2	rs77573141	234	V/I	V234I	missense_variant	tolerated	benign	V	I	guilty		FALSE
PTPN2	rs78174797	171	T/K	T171K	missense_variant	tolerated	benign	T	K	guilty		FALSE
PTPN21	rs150736820	1102	P/L	P1102L	missense_variant	tolerated	benign	P	L	guilty	31585107	FALSE
PTPN21	rs2274736	936	V/A	V936A	missense_variant	tolerated	benign	V	A	guilty	21752600	FALSE
PTPRD	rs10977171	447	Q/E	Q447E	missense_variant	tolerated	benign	Q	E	innocent		FALSE
PTPRJ	rs11039554	1235	I/T	I1235T	missense_variant	tolerated	possibly damaging	I	T	innocent		FALSE
PTPN21	rs2401751	385	L/F	L385F	missense_variant	tolerated	benign	L	F	guilty	21752600	FALSE
PTPN21	rs3825676	790	G/W	G790W	missense_variant	deleterious - low confidence	probably damaging	G	W	guilty	31585107	FALSE
PTPRQ	rs11114486	791	Q/K	Q791K	missense_variant	tolerated	benign	Q	K	innocent		FALSE
PTPN21	rs3825676	790	G/R	G790R	missense_variant	deleterious - low confidence	probably damaging	G	R	guilty	31585107	FALSE
PTPRQ	rs111994950	2121	K	K2121K	synonymous_variant/missense_variant	na/deleterious	na/probably damaging	K	K	innocent		FALSE
PTPRE	rs1129205				3_prime_UTR_variant					innocent		FALSE
PTPRN2	rs1130495	208	S/P	S208P/T	missense_variant	tolerated/tolerated	benign/benign	S	P	innocent		FALSE
PTPRN2	rs1130496	213	R/H	R213H	missense_variant	tolerated	benign	R	H	innocent		FALSE
PTPRN2	rs1130499	325	S/T	S325T/N	missense_variant	tolerated	benign	S	T	innocent		TRUE
PTPRN2	rs1130499	325	S/N	S325N	missense_variant	tolerated	benign	S	N	innocent		FALSE
PTPN14	rs1135352	1084	E/D	E1084D	missense_variant	tolerated	benign	E	D	innocent		TRUE
PTPN14	rs1135352	1084	E	E1084E	synonymous_variant			E	E	innocent		FALSE
PTPRQ	rs114143939				3_prime_UTR_variant					innocent		FALSE
PTPRK	rs11422080				intron_variant					innocent		FALSE
PTPRZ1	rs1147504	1433	G/D	G1433D	missense_variant	tolerated - low confidence	benign	G	D	innocent		TRUE
PTPRZ1	rs1147504	1433	G/V	G1433V	missense_variant	tolerated - low confidence	benign	G	V	innocent		FALSE
PTPRQ	rs1163042	2088	R/K	R2088K	missense_variant	deleterious	probably damaging	R	K	innocent		FALSE
PTPN9	rs11635996				intron_variant					innocent		FALSE
PTPRH	rs116363585	191	G/R	G191R	missense_variant	deleterious	benign	G	R	innocent		FALSE
PTPN23	rs1401681748	532	P/L	P532L	missense_variant	deleterious	probably damaging	P	L	guilty		FALSE
PTPRA	rs1178027	109	P/L	P109L	missense_variant	tolerated - low confidence	benign	P	L	innocent		FALSE
PTPRZ1	rs11980387	6	R/H	R6H	missense_variant	tolerated - low confidence	benign	R	H	innocent		TRUE
PTPRZ1	rs11980387	6	R/L	R6L	missense_variant	tolerated - low confidence	benign	R	L	innocent		FALSE
PTPN23	rs151119137	1196	R	R1196R	synonymous_variant			R	R	guilty		FALSE
PTPRC	rs12136658	570	H/Q	H570Q	missense_variant	tolerated	benign	H	Q	innocent		FALSE
PTPN23	rs151119137	1196	R/*	R1196*	stop_gained			R	*	guilty		FALSE
PTPN14	rs12239356	505	V/F	V505F	missense_variant	tolerated	benign	V	F	innocent		TRUE
PTPN14	rs12239356	505	V/I	V505I	missense_variant	tolerated	benign	V	I	innocent		FALSE
PTPN23	rs1576235873	1550	SP/SPX	SP1550SPX	frameshift_variant			SP	SPX	guilty		FALSE
PTPN13	rs12500797	1625	E/K	E1625K	missense_variant	tolerated	benign	E	K	innocent		TRUE
PTPN13	rs12500797	1625	E/Q	E1625Q	missense_variant	tolerated	benign	E	Q	innocent		FALSE
PTPN23	rs730882229	1332	R/H	R1332H	missense_variant	deleterious	probably damaging	R	H	guilty		TRUE
PTPN23	rs730882229	1332	R/L	R1332L	missense_variant	deleterious	probably damaging	R	L	guilty		FALSE
PTPRQ	rs12579151	830	V/A	V830A	missense_variant	deleterious	possibly damaging	V	A	innocent		FALSE
PTPN23	rs748130198	634	N	N634N	synonymous_variant			N	N	guilty		FALSE
PTPRG	rs1352882	816	I/M	I816M	missense_variant	deleterious	possibly damaging	I	M	innocent		TRUE
PTPRG	rs1352882	816	I	I816I	synonymous_variant			I	I	innocent		FALSE
PTPN23	rs748601492	302	M/V	M302V	missense_variant	tolerated	possibly damaging	M	V	guilty		FALSE
PTPN23	rs751809435	1295	EK/E	EK1295E	inframe_deletion			EK	E	guilty		FALSE
PTPRN2	rs140006434				intron_variant					innocent		FALSE
PTPN23	rs751809435	1295	EK/E	EK1295E	splice_region_variant			EK	E	guilty		FALSE
PTPN23	rs779096974	853	PAPPVAGLPSAPP/PAPP	PAPPVAGLPSAPP853PAPP	inframe_deletion			PAPPVAGLPSAPP	PAPP	guilty		TRUE
PTPN23	rs779096974	853	PAPPVAGLPSAPP/PAPPVAGLPSAPPVAGLPSAPP	PAPPVAGLPSAPP853PAPPVAGLPSAPPVAGLPSAPP	inframe_insertion			PAPPVAGLPSAPP	PAPPVAGLPSAPPVAGLPSAPP	guilty		FALSE
PTPN23	rs149563514	1099	P/T	P1099T	missense_variant	tolerated	benign	P	T	innocent		TRUE
PTPN23	rs149563514	1099	P/S	P1099S	missense_variant	tolerated	benign	P	S	innocent		FALSE
PTPN3	rs193920798	211	A/V	A211V	missense_variant	deleterious	probably damaging	A	V	guilty		FALSE
PTPN4	rs1259252500	838	R/*	R838*	stop_gained			R	*	guilty	34527963	FALSE
PTPN4	rs1677776998	64	L/W	L64W	missense_variant	deleterious	probably damaging	L	W	guilty	34527963	FALSE
PTPRN2	rs150508509	323	G/R	G323R	missense_variant	tolerated	benign	G	R	innocent		FALSE
PTPN4	rs1678390512	239	G/R	G239R	missense_variant	tolerated	benign	G	R	guilty	34527963	FALSE
PTPN4	rs1679218434	580	D/Y	D580Y	missense_variant	deleterious	probably damaging	D	Y	guilty	34527963	FALSE
PTPN4	rs1679433867	808	R/H	R808H	missense_variant	tolerated	probably damaging	R	H	guilty		FALSE
PTPRE	rs151117665				3_prime_UTR_variant					innocent		FALSE
PTPN4	rs1679434397	831	L/I	L831I	missense_variant	tolerated	probably damaging	L	I	guilty		FALSE
PTPN4	rs9308777				intron_variant					guilty	32484301	FALSE
PTPN5	rs1106865				intron_variant					guilty	30406174	FALSE
PTPN5	rs1550870	521	V	V521V	synonymous_variant			V	V	innocent		FALSE
PTPN5	rs2278732				intron_variant					guilty	22555153	FALSE
PTPN5	rs4075664				intron_variant					guilty	22555153	FALSE
PTPN5	rs4757710				intron_variant					guilty	22555153	TRUE
PTPN5	rs4757710				intron_variant					guilty	30406174	FALSE
PTPN5	rs56234898	66	S/P	S66P	missense_variant	tolerated - low confidence	benign	S	P	guilty	26872063	FALSE
PTPN6	rs200005925	441	E/G	E441G	missense_variant	tolerated	benign	E	G	guilty	21406173	FALSE
PTPN7	rs10920338				intron_variant					guilty	20668459	FALSE
PTPN9	rs10851882				intron_variant					guilty	34373992	FALSE
PTPN9	rs151265510	129	Q	Q129Q	synonymous_variant			Q	Q	guilty		FALSE
PTPN9	rs75393192				intron_variant					guilty	34373992	FALSE
PTPN9	rs76107647				intron_variant					guilty	34373992	FALSE
PTPRA	rs1016753				intron_variant					guilty	21831360	FALSE
PTPRA	rs1243121439	515	E/G	E515G	missense_variant	tolerated	benign	E	G	guilty	30594456	FALSE
PTPRH	rs16986309	543	L/F	L543F	missense_variant	tolerated	benign	L	F	innocent		FALSE
PTPRA	rs138210276	72	G	G72G	synonymous_variant			G	G	guilty	25393624	FALSE
PTPN13	rs17012064	1744	S/P	S1744P	missense_variant	tolerated	benign	S	P	innocent		FALSE
PTPRA	rs150908061	518	L	L518L	synonymous_variant			L	L	guilty	25393624	FALSE
PTPRA	rs375917163	767	L	L767L	synonymous_variant			L	L	guilty	25393624	FALSE
PTPRA	rs61742029	673	V/I	V673I	missense_variant	tolerated	benign	V	I	guilty	25393624	FALSE
PTPRA	rs751607902	768	R/W	R768W	missense_variant	deleterious	probably damaging	R	W	guilty	30594456	FALSE
PTPRA	rs760702716	57	T/N	T57N	missense_variant	tolerated - low confidence	benign	T	N	guilty	30594456	FALSE
PTPRA	rs762278281	129	A/V	A129V	missense_variant	tolerated - low confidence	benign	A	V	guilty	30594456	FALSE
PTPRQ	rs17713202	1202	N/D	N1202D	missense_variant	tolerated	benign	N	D	innocent		TRUE
PTPRQ	rs17713202	1202	N/Y	N1202Y	missense_variant	deleterious	benign	N	Y	innocent		FALSE
PTPRT	rs17811401	76	M/V	M76V	missense_variant	tolerated	benign	M	V	innocent		FALSE
PTPRN	rs186464460	11	G/W	G11W	missense_variant	deleterious - low confidence	possibly damaging	G	W	innocent		TRUE
PTPRN	rs186464460	11	G/R	G11R	missense_variant	tolerated - low confidence	benign	G	R	innocent		FALSE
PTPRB	rs17226367	2152	G/A	G2152A	missense_variant	tolerated	possibly damaging	G	A	guilty	25537509	FALSE
PTPRB	rs186466118	1376	S/G	S1376G	missense_variant	deleterious	possibly damaging	S	G	guilty	33568133	FALSE
PTPRB	rs2165627	633	D/E	D633E	missense_variant	tolerated	benign	D	E	guilty	25537509	TRUE
PTPRB	rs2165627	633	D	D633D	synonymous_variant			D	D	guilty	25537509	FALSE
PTPRB	rs2252784	312	R/M	R312M	missense_variant	deleterious	possibly damaging	R	M	guilty	25537509	FALSE
PTPRM	rs199876491	1356	V/G	V1356G	missense_variant	deleterious	possibly damaging	V	G	innocent		FALSE
PTPRB	rs2252784	312	R/K	R312K	missense_variant	tolerated	benign	R	K	guilty	25537509	FALSE
PTPN18	rs200795864	23	G/A	G23A	missense_variant	tolerated	benign	G	A	innocent		FALSE
PTPRD	rs201582858	1333	S/N	S1333N	missense_variant	tolerated	benign	S	N	innocent		FALSE
PTPN20	rs202027139	392	R/H	R392H	missense_variant	deleterious	probably damaging	R	H	innocent		FALSE
PTPRB	rs2465811	345	S/C	S345C	missense_variant	deleterious	probably damaging	S	C	guilty	25537509	TRUE
PTPRB	rs2465811	345	S/G	S345G	missense_variant	tolerated	benign	S	G	guilty	25537509	FALSE
PTPRB	rs2584021	57	D/N	D57N	missense_variant	tolerated - low confidence	benign	D	N	guilty	25537509	TRUE
PTPRB	rs2584021	57	D/N	D57N	missense_variant	tolerated - low confidence	benign	D	N	guilty	30826882	FALSE
PTPRJ	rs2229701	293	A/T	A293T	missense_variant	tolerated	benign	A	T	innocent		TRUE
PTPRJ	rs2229701	293	A/T	A293T	splice_region_variant	tolerated	benign	A	T	innocent		FALSE
PTPRJ	rs2229703	372	V/I	V372I	missense_variant	tolerated	benign	V	I	innocent		FALSE
PTPN13	rs2230600	1522	I/M	I1522M	missense_variant	tolerated	benign	I	M	innocent		FALSE
PTPN12	rs2230602	706	E/K	E706K	missense_variant	tolerated - low confidence	benign	E	K	innocent		FALSE
PTPRC	rs2230606	296	I/L	I296L	missense_variant	tolerated	benign	I	L	innocent		FALSE
PTPRS	rs2230610	991	A/V	A991V	missense_variant	tolerated	benign	A	V	innocent		FALSE
PTPRU	rs2235937	930	N/S	N930S	missense_variant	tolerated	benign	N	S	innocent		TRUE
PTPRU	rs2235937	930	N/I	N930I	missense_variant	deleterious	benign	N	I	innocent		FALSE
PTPRB	rs61758735	1690	T/I	T1690I	missense_variant	deleterious	possibly damaging	T	I	guilty	30724488	FALSE
PTPRC	rs10919563				intron_variant					guilty	19898481	FALSE
PTPRC	rs1164362432	665	S/R	S665R	missense_variant	deleterious	probably damaging	S	R	guilty	31848144	FALSE
PTPRC	rs1485162890	1000	D/V	D1000V	missense_variant	deleterious	probably damaging	D	V	guilty	31848144	FALSE
PTPRC	rs17612648	59	P	P59P	synonymous_variant			P	P	guilty		FALSE
PTPRC	rs746480752	49	P/T	P49T	missense_variant	deleterious - low confidence	probably damaging	P	T	guilty	31848144	FALSE
PTPRD	rs10115782				intron_variant					guilty	26181631	FALSE
PTPRD	rs10977015				intron_variant					guilty	34046847	FALSE
PTPRH	rs2288419	1076	I/V	I1076V	missense_variant	deleterious	possibly damaging	I	V	innocent		FALSE
PTPRH	rs2288515	348	H/Y	H348Y	missense_variant	deleterious	benign	H	Y	innocent		FALSE
PTPRH	rs2288521	640	L	L640L	synonymous_variant			L	L	innocent		FALSE
PTPRH	rs2288523	781	K/N	K781N	missense_variant	tolerated	benign	K	N	innocent		TRUE
PTPRH	rs2288523	781	K	K781K	synonymous_variant			K	K	innocent		FALSE
PTPRD	rs12003835				intron_variant					guilty	31070104	FALSE
PTPRD	rs17584499				intron_variant					guilty	29858661	FALSE
PTPRU	rs2295061	855	Y/*	Y855*	stop_gained			Y	*	innocent		TRUE
PTPRU	rs2295061	855	Y	Y855Y	synonymous_variant			Y	Y	innocent		FALSE
PTPRD	rs17584499				intron_variant					guilty	33706321	FALSE
PTPRB	rs2304821	1157	T/M	T1157M	missense_variant	tolerated	benign	T	M	innocent		FALSE
PTPRD	rs17584499				intron_variant					guilty	29858661	FALSE
PTPRD	rs1975197				intron_variant					guilty	26181631	FALSE
PTPRD	rs2279776	1418	G	G1418G	synonymous_variant			G	G	guilty	23069849	FALSE
PTPRD	rs2381801				intron_variant					guilty	29483675	FALSE
PTPRD	rs2381970				intron_variant					guilty	26181631	FALSE
PTPRD	rs2475335				intron_variant					guilty	29608257	FALSE
PTPRD	rs324498				intron_variant					guilty	30237584	FALSE
PTPN22	rs2476601	620	R/W	R620W	missense_variant	tolerated	benign	R	W	innocent/guilty?		FALSE
PTPRD	rs35331017				intron_variant					guilty	32726798	FALSE
PTPRD	rs35929428	995	R/C	R995C	missense_variant	tolerated	benign	R	C	guilty	28497593	FALSE
PTPRD	rs4626664				intron_variant					guilty	26181631	FALSE
PTPRD	rs560380				intron_variant					guilty	28322283	FALSE
PTPRD	rs7470838				intron_variant					guilty	26181631	FALSE
PTPRG	rs139041779	426	V/M	V426M	missense_variant	deleterious	possibly damaging	V	M	guilty	25158255	FALSE
PTPRT	rs2867655	29	A/P	A29P	missense_variant	tolerated	benign	A	P	innocent		FALSE
PTPRG	rs2292245	574	G/S	G574S	missense_variant	tolerated	benign	G	S	guilty	23758498	TRUE
PTPRG	rs2292245	574	G/S	G574S	missense_variant	tolerated	benign	G	S	guilty	23758498	FALSE
PTPRG	rs704341				intron_variant					guilty	26089329	FALSE
PTPRG	rs7609954				intron_variant					guilty	26830138	FALSE
PTPN4	rs3189128	924	T/A	T924A	missense_variant	tolerated - low confidence	benign	T	A	innocent		TRUE
PTPN4	rs3189128	924	T/S	T924S	missense_variant	tolerated - low confidence	benign	T	S	innocent		FALSE
PTPRG	rs7640737				intron_variant					guilty	23758498	FALSE
PTPN22	rs33996649	263	R/Q	R263Q	missense_variant	tolerated	benign	R	Q	innocent		FALSE
PTPN13	rs34226837	2458	I/V	I2458V	missense_variant	tolerated	benign	I	V	innocent		FALSE
PTPRM	rs35224276	39	S/R	S39R	missense_variant	tolerated	possibly damaging	S	R	innocent		FALSE
PTPRN	rs35314717	419	S/R	S419R	missense_variant	tolerated	benign	S	R	innocent		FALSE
PTPRJ	rs1503185	326	R/Q	R326Q	missense_variant	tolerated	benign	R	Q	guilty	19672627	FALSE
PTPRU	rs35332573	60	T/N	T60N	missense_variant	deleterious	benign	T	N	innocent		FALSE
PTPRR	rs35387004	386	V/I	V386I	missense_variant	tolerated	benign	V	I	innocent		FALSE
PTPRR	rs35390084	439	V/I	V439I	missense_variant	tolerated	benign	V	I	innocent		FALSE
PTPRJ	rs1503185	326	R/Q	R326Q	missense_variant	tolerated	benign	R	Q	guilty	30661225	FALSE
PTPRH	rs36092369	831	G/A	G831A	missense_variant	deleterious	benign	G	A	innocent		TRUE
PTPRH	rs36092369	831	G/D	G831D	missense_variant	tolerated	benign	G	D	innocent		FALSE
PTPN12	rs3750050	573	T/A	T573A	missense_variant	tolerated	benign	T	A	innocent		FALSE
PTPRN2	rs3752368	343	V/L	V343L	missense_variant	tolerated	benign	V	L	innocent		TRUE
PTPRN2	rs3752368	343	V/M	V343M	missense_variant	tolerated	benign	V	M	innocent		FALSE
PTPRJ	rs1503185	326	R/Q	R326Q	missense_variant	tolerated	benign	R	Q	guilty	22677127	FALSE
PTPN3	rs3793524	90	A/S	A90S	missense_variant	tolerated	benign	A	S	innocent		TRUE
PTPN3	rs3793524	90	A/P	A90P	missense_variant	tolerated	benign	A	P	innocent		TRUE
PTPN3	rs3793524	90	A/T	A90T	missense_variant	deleterious	benign	A	T	innocent		FALSE
PTPRN2	rs3800855	140	S/T	S140T	missense_variant	tolerated	benign	S	T	innocent		FALSE
PTPRJ	rs151078858	1091	T/M	T1091M	missense_variant	deleterious	probably damaging	T	M	guilty	33692975	FALSE
PTPRJ	rs1566734	276	Q/P	Q276P	missense_variant	tolerated	benign	Q	P	guilty	19672627	TRUE
PTPRJ	rs1566734	276	Q/P	Q276P	missense_variant	tolerated	benign	Q	P	guilty	23341091	TRUE
PTPRJ	rs1566734	276	Q/P	Q276P	missense_variant	tolerated	benign	Q	P	guilty	30661225	FALSE
PTPN7	rs3935295				upstream/intron variant					innocent		FALSE
PTPRJ	rs1566734	276	Q/P	Q276P	missense_variant	tolerated	benign	Q	P	guilty	22677127	FALSE
PTPRC	rs41269905	123	D/H	D123H	missense_variant	deleterious - low confidence	possibly damaging	D	H	innocent		FALSE
PTPRT	rs41279258	392	N	N392N	synonymous_variant			N	N	innocent		TRUE
PTPRT	rs41279258	392	N/K	N392K	missense_variant	tolerated	benign	N	K	innocent		FALSE
PTPN7	rs4309039				upstream/intron variant					innocent		FALSE
PTPRQ	rs4482094	286	A/D	A286D	missense_variant	deleterious	benign	A	D	innocent		TRUE
PTPRQ	rs4482094	286	A/V	A286V	missense_variant	tolerated	benign	A	V	innocent		FALSE
PTPRH	rs45493898	226	L/P	L226P	missense_variant	deleterious	probably damaging	L	P	innocent		TRUE
PTPRH	rs45493898	226	L/Q	L226Q	missense_variant	deleterious	probably damaging	L	Q	innocent		FALSE
PTPRH	rs45535035	243	V/I	V243I	missense_variant	tolerated	benign	V	I	innocent		FALSE
PTPRJ	rs1566734	276	Q/P	Q276P	missense_variant	tolerated	benign	Q	P	guilty	27309885	FALSE
PTPRJ	rs2270992	233	T	T233T	synonymous_variant			T	T	guilty	23341091	FALSE
PTPRJ	rs2270993	206	E	E206E	synonymous_variant			E	E	guilty	23341091	TRUE
PTPRJ	rs2270993	206	E	E206E	splice_region_variant			E	E	guilty	23341091	FALSE
PTPRJ	rs4752904	872	E	E872E	synonymous_variant			E	E	guilty	23341091	TRUE
PTPRJ	rs4752904	872	E	E872E	synonymous_variant			E	E	guilty	22677127	TRUE
PTPRJ	rs4752904	872	E	E872E	synonymous_variant			E	E	guilty	27309885	FALSE
PTPN5	rs4757707	170	P/S	P170S	missense_variant	tolerated	benign	P	S	innocent		TRUE
PTPN5	rs4757707	170	P/A	P170A	missense_variant	tolerated	benign	P	A	innocent		FALSE
PTPRJ	rs4752904	872	E/D	E872D	missense_variant	tolerated	benign	E	D	guilty	23341091	TRUE
PTPRJ	rs4752904	872	E/D	E872D	missense_variant	tolerated	benign	E	D	guilty	22677127	TRUE
PTPRJ	rs4752904	872	E/D	E872D	missense_variant	tolerated	benign	E	D	guilty	27309885	FALSE
PTPRC	rs4915154	193	T/A	T193A	missense_variant	tolerated	benign	T	A	innocent		FALSE
PTPRZ1	rs539780818	389	V/L	V389L	missense_variant	tolerated	possibly damaging	V	L	innocent		FALSE
PTPRM	rs78021424				intron_variant					guilty	32056145	FALSE
PTPN14	rs55801232	189	E/G	E189G	missense_variant	tolerated	probably damaging	E	G	innocent		FALSE
PTPRH	rs55870162	232	D/N	D232N	missense_variant	tolerated	benign	D	N	innocent		FALSE
PTPRN2	rs10245268				intron_variant					guilty	31206606	FALSE
PTPRN2	rs1257461683	806	I/V	I806V	missense_variant	deleterious	possibly damaging	I	V	guilty	32172663	FALSE
PTPRN2	rs1670344				intron_variant					guilty	30890718	FALSE
PTPRQ	rs57971665	431	R/Q	R431Q	missense_variant	tolerated	possibly damaging	R	Q	innocent		FALSE
PTPRB	rs582954	2031	D	D2031D	synonymous_variant			D	D	innocent		TRUE
PTPRB	rs582954	2031	D/E	D2031E	missense_variant	deleterious	probably damaging	D	E	innocent		FALSE
PTPRM	rs593978	1390	E	E1390E	synonymous_variant			E	E	innocent		TRUE
PTPRM	rs593978	1390	E/D	E1390D	missense_variant	deleterious	benign	E	D	innocent		FALSE
PTPRQ	rs60216135	17	T/I	T17I	missense_variant	tolerated	benign	T	I	innocent		FALSE
PTPRN2	rs2091718				intron_variant					guilty	35052758	FALSE
PTPRN2	rs2335845				intron_variant					guilty	31206606	FALSE
PTPRM	rs61496201				intron_variant					innocent		FALSE
PTPRQ	rs61729263	1492	Y/C	Y1492C	missense_variant	tolerated	benign	Y	C	innocent		TRUE
PTPRQ	rs61729263	1492	Y/F	Y1492F	missense_variant	tolerated	benign	Y	F	innocent		FALSE
PTPRQ	rs61729275	1062	Y/*	Y1062*	stop_gained			Y	*	innocent		TRUE
PTPRQ	rs61729275	1062	Y	Y1062Y	synonymous_variant			Y	Y	innocent		FALSE
PTPRQ	rs61729278	1014	I/V	I1014V	missense_variant	tolerated	benign	I	V	innocent		FALSE
PTPRQ	rs61729287	429	Q/E	Q429E	missense_variant	deleterious	benign	Q	E	innocent		FALSE
PTPRQ	rs61729309	1967	D	D1967D	synonymous_variant			D	D	innocent		FALSE
PTPRS	rs61729768	1500	K/N	K1500N	missense_variant	deleterious	probably damaging	K	N	innocent		TRUE
PTPRS	rs61729768	1500	K	K1500K	synonymous_variant			K	K	innocent		FALSE
PTPRS	rs61729772	1674	G/C	G1674C	missense_variant	deleterious	probably damaging	G	C	innocent		FALSE
PTPRS	rs61729778	929	R/C	R929C	missense_variant	deleterious	benign	R	C	innocent		FALSE
PTPRS	rs61729780	433	V/E	V433E	missense_variant	deleterious	probably damaging	V	E	innocent		FALSE
PTPRU	rs61729921	833	V/F	V833F	missense_variant	tolerated	possibly damaging	V	F	innocent		FALSE
PTPN13	rs61730646	289	G/S	G289S	missense_variant	tolerated	benign	G	S	innocent		FALSE
PTPRB	rs61731914	750	M/I	M750I	missense_variant	tolerated	benign	M	I	innocent		FALSE
PTPRZ1	rs61732005	1384	D/N	D1384N	missense_variant	deleterious - low confidence	benign	D	N	innocent		FALSE
PTPRD	rs61733190	885	I/V	I885V	missense_variant	tolerated	benign	I	V	innocent		FALSE
PTPRD	rs61733196	1305	P/L	P1305L	missense_variant	tolerated	benign	P	L	innocent		FALSE
PTPRH	rs61734259	951	G/D	G951D	missense_variant	tolerated	benign	G	D	innocent		FALSE
PTPRM	rs61737157	1080	P/A	P1080A	missense_variant	deleterious	probably damaging	P	A	innocent		TRUE
PTPRM	rs61737157	1080	P/S	P1080S	missense_variant	deleterious	probably damaging	P	S	innocent		FALSE
PTPN22	rs61738614	206	L/R	L206R	missense_variant	deleterious	probably damaging	L	R	innocent		FALSE
PTPRT	rs61741566	1127	V/G	V1127G	missense_variant	deleterious	probably damaging	V	G	innocent		FALSE
PTPRO	rs10846175				intron_variant					guilty	27272414	FALSE
PTPRR	rs61742543	636	Q/K	Q636K	missense_variant	deleterious	probably damaging	Q	K	innocent		FALSE
PTPN21	rs61742571	280	I/M	I280M	missense_variant	deleterious	probably damaging	I	M	innocent		TRUE
PTPN21	rs61742571	280	I	I280I	synonymous_variant			I	I	innocent		FALSE
PTPRS	rs61743105	1253	S	S1253S	synonymous_variant			S	S	innocent		TRUE
PTPRS	rs61743105	1253	S/R	S1253R	missense_variant	tolerated	benign	S	R	innocent		FALSE
PTPRT	rs61749502	813	A/T	A813T	missense_variant	tolerated	benign	A	T	innocent		FALSE
PTPN13	rs61750816	2205	R/Q	R2205Q	missense_variant	tolerated	benign	R	Q	innocent		FALSE
PTPRB	rs61754227	1446	R/W	R1446W	missense_variant	tolerated	possibly damaging	R	W	innocent		TRUE
PTPRB	rs61754227	1446	R	R1446R	synonymous_variant			R	R	innocent		FALSE
PTPRO	rs61754411	370	N/K	N370K	missense_variant	deleterious - low confidence	possibly damaging	N	K	guilty	28199135	TRUE
PTPRO	rs61754411	370	N	N370N	synonymous_variant			N	N	guilty	28199135	FALSE
PTPN7	rs61757798				intron_variant					innocent		FALSE
PTPRK	rs61757811	1033	R/S	R1033S	missense_variant	deleterious	possibly damaging	R	S	innocent		TRUE
PTPRK	rs61757811	1033	R/S	R1033S	splice_region_variant	deleterious	possibly damaging	R	S	innocent		TRUE
PTPRK	rs61757811	1033	R	R1033R	synonymous_variant			R	R	innocent		TRUE
PTPRK	rs61757811	1033	R	R1033R	splice_region_variant			R	R	innocent		FALSE
PTPRO	rs7976329				intron_variant					guilty	27272414	FALSE
PTPRG	rs62620047	92	Y/H	Y92H	missense_variant	tolerated	benign	Y	H	innocent		FALSE
PTPRZ1	rs62639684	1425	G/D	G1425D	missense_variant	tolerated - low confidence	benign	G	D	innocent		FALSE
PTPRF	rs641351	1436	R	R1436R	synonymous_variant			R	R	innocent		TRUE
PTPRF	rs641351	1436	R/S	R1436S	missense_variant	deleterious	probably damaging	R	S	innocent		FALSE
PTPRR	rs11178469				intron_variant					guilty	34122509	FALSE
PTPRR	rs3803036	314	K/I	K314I	missense_variant	tolerated	benign	K	I	guilty	23422819	FALSE
PTPRQ	rs6539524	1056	F/L	F1056L	missense_variant	tolerated	benign	F	L	innocent		FALSE
PTPN23	rs6780013	944	A/T	A944T	missense_variant	tolerated - low confidence	benign	A	T	innocent		TRUE
PTPN23	rs6780013	944	A/P	A944P	missense_variant	tolerated - low confidence	benign	A	P	innocent		FALSE
PTPRG	rs6807754				intron_variant					innocent		FALSE
PTPRR	rs3803036	314	K/R	K314R	missense_variant	tolerated	benign	K	R	guilty	23422819	FALSE
PTPN3	rs7021839				upstream variant					innocent		FALSE
PTPRR	rs73341069	239	V/I	V239I	missense_variant	tolerated	benign	V	I	guilty	26604137	FALSE
PTPRN2	rs71189762				intron_variant					innocent		FALSE
PTPRO	rs7132826				intron_variant					innocent		FALSE
PTPRD	rs72694737	781	T/A	T781A	missense_variant	tolerated	benign	T	A	innocent		FALSE
PTPN14	rs72757962	857	G/D	G857D	missense_variant	tolerated	benign	G	D	innocent		FALSE
PTPRB	rs7298147	180	G/S	G180S	missense_variant	tolerated - low confidence	benign	G	S	innocent		FALSE
PTPRT	rs11086843				intron_variant					guilty	18668548	FALSE
PTPRT	rs2866943				3_prime_UTR_variant					guilty	25967969	FALSE
PTPRT	rs73099985				intron_variant					innocent		FALSE
PTPRT	rs490514				intron_variant					guilty	26283027	FALSE
PTPRN2	rs73745196	247	S/G	S247G	missense_variant	tolerated	benign	S	G	innocent		FALSE
PTPRT	rs73909220	933	V/L	V933L	missense_variant	tolerated	benign	V	L	innocent		FALSE
PTPRT	rs73910607				intron_variant					innocent		FALSE
PTPRZ1	rs740965	3	I/S	I3S	missense_variant	deleterious - low confidence	benign	I	S	innocent		FALSE
PTPN7	rs74136747				intron in P35236, coding in other					innocent		FALSE
PTPN18	rs74409947	95	V/M	V95M	missense_variant	deleterious	benign	V	M	innocent		FALSE
PTPRT	rs6029959				3_prime_UTR_variant					guilty	25967969	FALSE
PTPRT	rs6030462				intron_variant					guilty	34707478	FALSE
PTPRT	rs762135776	69	V/A	V69A	missense_variant	deleterious	benign	V	A	guilty	26539891	FALSE
PTPRT	rs768757373	183	R/Q	R183Q	missense_variant	tolerated	benign	R	Q	guilty		FALSE
PTPRU	rs540351799	1389	M/L	M1389L	missense_variant	deleterious	probably damaging	M	L	guilty		FALSE
PTPRU	rs559788899	844	P/L	P844L	missense_variant	deleterious	benign	P	L	guilty		FALSE
PTPRZ1	rs12154537				intron_variant					guilty	34081644	FALSE
PTPRZ1	rs1918031				intron_variant					guilty	34081644	FALSE
PTPRZ1	rs6466808				intron_variant					guilty	34081644	FALSE
PTPRZ1	rs6466810				intron_variant					guilty	34081644	FALSE
PTPRZ1	rs6955395				intron_variant					guilty	34081644	FALSE
	rs11635996									guilty	22503546	FALSE
	rs10081191									guilty	33242228	FALSE
PTPRN2	rs76275928				intron_variant					innocent		FALSE
PTPRE	rs76309261				intron_variant					innocent		FALSE
	rs1029089									guilty	25994864	FALSE
	rs10914351									guilty	25109461	FALSE
PTPRG	rs7650104	412	H	H412H	synonymous_variant			H	H	innocent		TRUE
PTPRG	rs7650104	412	H/Q	H412Q	missense_variant	tolerated	possibly damaging	H	Q	innocent		FALSE
PTPN7	rs76660901				upstream/intron variant					innocent		FALSE
	rs10976737									guilty	23903073	FALSE
	rs12537271									guilty	25994864	FALSE
PTPN14	rs77713106	90	A/T	A90T	missense_variant	deleterious	possibly damaging	A	T	innocent		FALSE
	rs1678083679									guilty	34527963	FALSE
	rs1705261594									guilty		FALSE
	rs2146180									guilty	23903073	FALSE
VPS16	rs78044640	465	L	L465L	synonymous_variant			L	L	innocent		FALSE
PTPN13	rs780661649	283	E/DX	E283DX	frameshift_variant			E	DX	innocent		FALSE
	rs2296094									guilty	26181631	FALSE
	rs2488457									guilty	35692826	FALSE
PTPRE	rs78752313	150	T/S	T150S	missense_variant	tolerated	benign	T	S	innocent		FALSE
	rs2542151									guilty		FALSE
PTPRN2	rs78784885	190	E/K	E190K	missense_variant	tolerated	benign	E	K	innocent		FALSE
PTPRQ	rs78857302	33	T/N	T33N	missense_variant	deleterious	benign	T	N	innocent		TRUE
PTPRQ	rs78857302	33	T/I	T33I	missense_variant	deleterious	benign	T	I	innocent		FALSE
PTPRE	rs7898794				3_prime_UTR_variant					innocent		FALSE
PTPN12	rs78997339	471	I/V	I471V	missense_variant	tolerated - low confidence	benign	I	V	innocent		FALSE
PTPRC	rs79141749	351	N/S	N351S	missense_variant	tolerated	benign	N	S	innocent		FALSE
PTPRN2	rs79195347				intron_variant					innocent		FALSE
PTPN5	rs7946105				3_prime_UTR_variant					innocent		FALSE
	rs7640737									guilty	23758498	FALSE
PTPRJ	rs79602244	635	S/R	S635R	missense_variant	tolerated	benign	S	R	innocent		FALSE
PTPRQ	rs7963963	1692	I/T	I1692T	missense_variant	deleterious	possibly damaging	I	T	innocent		FALSE
PTPRQ	rs7965277	819	V/E	V819E	missense_variant	tolerated	benign	V	E	innocent		TRUE
PTPRQ	rs7965277	819	V/E	V819E	splice_region_variant	tolerated	benign	V	E	innocent		TRUE
PTPRQ	rs7965277	819	V/A	V819A	missense_variant	tolerated	benign	V	A	innocent		TRUE
PTPRQ	rs7965277	819	V/A	V819A	splice_region_variant	tolerated	benign	V	A	innocent		TRUE
PTPRQ	rs7965277	819	V/G	V819G	missense_variant	tolerated	benign	V	G	innocent		TRUE
PTPRQ	rs7965277	819	V/G	V819G	splice_region_variant	tolerated	benign	V	G	innocent		FALSE
PTPRQ	rs7975340	1078	A/P	A1078P	missense_variant	tolerated	benign	A	P	innocent		FALSE
	rs7861684									guilty	23903073	FALSE
PTPN14	rs80056850	924	I/V	I924V	missense_variant	tolerated	benign	I	V	innocent		FALSE
PTPRN2	rs80199992				intron_variant					innocent		FALSE
PTPRB	rs80210207	904	Q/R	Q904R	missense_variant	tolerated	benign	Q	R	innocent		FALSE
	rs7875560									guilty	26314684	FALSE
	rs930926									guilty	30685201	FALSE
PTPN12	rs9640663	322	V/I	V322I	missense_variant	tolerated	benign	V	I	innocent		TRUE
PTPN12	rs9640663	322	V/L	V322L	missense_variant	tolerated	benign	V	L	innocent		FALSE
PTPRG	rs9870460	639	Q/R	Q639R	missense_variant	tolerated	benign	Q	R	innocent		FALSE
PTPN13	rs989902	2081	Y/D	Y2081D	missense_variant	tolerated	benign	Y	D	innocent		FALSE
										guilty	32499645	TRUE
										guilty	24463507	TRUE
										guilty	34527963	TRUE
										guilty	29093530	TRUE
										guilty	30594456	TRUE
										guilty	33466296	TRUE
										guilty	29762926	TRUE
										guilty	31088393	TRUE
										guilty	28983737	TRUE

## Sheet: Suppl Table 1
Gene	SNP ID	Protein annotation	Variant type	PMID	ClinVar ID (nr, not reported)	ClinVar Interpretation (P, pathogenic; LP. Likely pathogenic; B. benign; LB, likely benign; R, risk factor; US, uncertain significance; A, association)
PTPN1	-	F327F	synonymous variant	11836311	nr
PTPN1	-		intron variant	15919835
PTPN1	rs16995309	P387L	missense variant	15919835	nr
PTPN11	rs121918457	T468M	missense variant	23457302	VCV000013331.48	P
PTPN11	rs121918456	Y279C	missense variant	23457302	nr
PTPN11	rs80269561		3 prime UTR variant		nr
PTPN12	rs2230602	E706K	missense variant		nr
PTPN12	rs3750050	T573A	missense variant		nr
PTPN12	rs78997339	I471V	missense variant		nr
PTPN12	rs9640663	V322I	missense variant		nr
PTPN13	-	W2132*	stop gained	29093530	nr
PTPN13	rs10033029	F1356L	missense variant		nr
PTPN13	rs12500797	E1625K	missense variant		nr
PTPN13	rs17012064	S1744P	missense variant		VCV000712550.4	B
PTPN13	rs2230600	I1522M	missense variant		nr
PTPN13	rs34226837	I2458V	missense variant		nr
PTPN13	rs61730646	G289S	missense variant		VCV001049259.1	LB
PTPN13	rs61750816	R2205Q	missense variant		VCV001049428.1	LB
PTPN13	rs989902	Y2081D	missense variant		nr
PTPN14	-	Q405*	stop gained	35830698	nr
PTPN14	-	Q619*	stop gained	35830698/33491997	nr
PTPN14	-	Q622*	stop gained	35830698	nr
PTPN14	-	F403fs*	frameshift variant	35830698	nr
PTPN14	-	K223N	missense variant	35830698	nr
PTPN14	rs12239356	V505F	missense variant		nr
PTPN14	rs142697907		intron variant	27485598	nr
PTPN14	rs2936017		intron variant	22233626	nr
PTPN14	rs2936018		intron variant	22233626	nr
PTPN14	rs3002297		intron variant	22233626	nr
PTPN14	rs3002300		intron variant	22233626	nr
PTPN14	rs55801232	E189G	missense variant		nr
PTPN14	rs72757962	G857D	missense variant		nr
PTPN14	rs77713106	A90T	missense variant		VCV000767749.4	B
PTPN14	rs80056850	I924V	missense variant		nr
PTPN14	rs971817654	R1016*	stop gained	35830698	nr
PTPN18	rs200795864	G23A	missense variant		nr
PTPN18	rs74409947	V95M	missense variant		nr
PTPN2	-	C216G	missense variant	32721438	nr
PTPN2	rs1893217		intron variant	34623320	nr
PTPN2	rs77573141	V234I	missense variant		VCV000711701.3	B
PTPN2	rs78174797	T171K	missense variant		VCV000775462.3	B
PTPN20	rs202027139	R392H	missense variant		nr
PTPN21	rs150736820	P1102L	missense variant	31585107	nr
PTPN21	rs2274736	V936A	missense variant	21752600	nr
PTPN21	rs2401751	L385F	missense variant	21752600	nr
PTPN21	rs3825676	G790W/R	missense variant	31585107	nr
PTPN22	rs2476601	R620W	misense variant	35692826	VCV000008909.8	B
PTPN22	rs2488457		upstream variant	35692826	VCV000008910.1	R
PTPN22	rs33996649	R263Q	missense variant		nr
PTPN22	rs61738614	L206R	missense variant		nr
PTPN23	-	L992fs*	frameshift variant	29899372	VCV000915885.1	P
PTPN23	-	V857_P865del	inframe deletion	31395947	nr
PTPN23	rs1576235873	L1552fs*	frameshift variant	31395947/34064836	VCV000636321.2	P/LP
PTPN23	-	P1572fs*	frameshift variant	34064836	nr
PTPN23	rs138076291	P829L	missense variant	31395947	VCV000636318.5	US
PTPN23	rs1401681748	P532L	missense variant	29090338	VCV000915884.1	P
PTPN23	rs147293860	K583R	missense variant	31395947	VCV000636323.7	US
PTPN23	rs148689441	E1250K	missense variant	31395947	VCV000636315.3	US
PTPN23	rs149563514	P1099T	missense variant		nr
PTPN23	rs150712932	R431W	missense variant	31395947	VCV000636317.3	US
PTPN23	rs151119137	R1196fs*	stop gained	29090338	nr
PTPN23	rs201017613	Q1017H	missense variant	31395947	VCV000636324.7	US
PTPN23	rs577689618	R232Q	missense variant	31395947	VCV000636322.3	US
PTPN23	rs6780013	A944T	missense variant		nr
PTPN23	rs730882229	R1332L	missense variant	25558065	VCV000183326.2	P/LP
PTPN23	rs748130198	N634K	missense variant	29899372	VCV000915886.1	P/LP
PTPN23	rs748601492	M302V	missense variant	27848944	VCV000915882.1	P/LP
PTPN23	rs751809435	EK1295E	inframe deletion, splice region variant	31395947	VCV000636320.5	B
PTPN23	rs760022693	QPHPQPHP956QPHP	inframe deletion	31395947	VCV000636316.8	US
PTPN23	rs770692989	Q916R	missense variant	31395947	VCV000636314.5	US
PTPN23	rs779096974	PAPPVAGLPSAPP853PAPP/PAPPVAGLPSAPPVAGLPSAPP	inframe deletion		VCV000636319.2	P/LP
PTPN23	rs967738491	H894Y	missense variant	31395947	VCV000636313.3	US
PTPN3	-	Q447K	missense variant	24463507	nr
PTPN3	rs193920798	A211V	missense variant		VCV000161535.1	US
PTPN3	rs3793524	A90P	missense variant	18978678	nr
PTPN4	-	L72S	missense variant	30238967	nr
PTPN4	rs1259252500	R838fs*	stop gained	34527963	VCV000984797.1	US
PTPN4	rs1677776998	L64W	missense variant	34527963	VCV000986785.1	US
PTPN4	rs1678083679	Q132Tfs*	frameshift variant	34527963	VCV000984725.1	US
PTPN4	rs1678390512	G239R	missense variant	34527963	VCV000984726.1	US
PTPN4	rs1679218434	D580Y	missense variant	34527963	VCV000998079.2	LP
PTPN4	rs1679433867	R808H	missense variant		VCV000984744.1	US
PTPN4	rs1679434397	L831I	missense variant		VCV000978152.1	US
PTPN4	rs3189128	T924S	missense variant		nr
PTPN4	rs9308777		intron variant	32484301	nr
PTPN5	rs1106865		intron variant	30406174	nr
PTPN5	rs2278732		intron variant	22555153	nr
PTPN5	rs4075664		intron variant	22555153	nr
PTPN5	rs4757707	P170A	missense variant		nr
PTPN5	rs4757710		intron variant	22555153/30406174	nr
PTPN5	rs56234898	S66P	missense variant	26872063	nr
PTPN6	rs200005925	E441G	missense variant	21406173	nr
PTPN6	-	A455T	missense variant	31000475	nr
PTPN7	rs10920338		intron variant	20668459	nr
PTPN9	rs10851882		intron variant	34373992	nr
PTPN9	rs11635996		intron variant	22503546	nr
PTPN9	rs75393192		intron variant	34373992	nr
PTPN9	rs76107647		intron variant	34373992	nr
PTPRA	rs1016753		intron variant	21831360	nr
PTPRA	rs1178027	P109L	missense variant		nr
PTPRA	rs1243121439	E515G	missense variant	30594456	nr
PTPRA	rs138210276	G72G	synonymous variant	25393624	nr
PTPRA	rs150908061	L518L	synonymous variant	25393624	nr
PTPRA	rs375917163	L767L	synonymous variant	25393624	nr
PTPRA	rs6076463		intron variant	34782459	nr
PTPRA	rs61742029	V673I	missense variant	25393624	nr
PTPRA	rs751607902	R768W	missense variant	30594456	nr
PTPRA	rs760702716	T57N	missense variant	30594456	nr
PTPRA	rs762278281	A129V	missense variant	30594456	nr
PTPRB	rs17226367	G2152A	missense variant	25537509	nr
PTPRB	rs186466118	S1376G	missense variant	33568133	nr
PTPRB	rs2165627	D633E	synonymous variant	25537509	nr
PTPRB	rs2252784	R312K	missense variant	25537509	nr
PTPRB	rs2304821	T1157M	missense variant		nr
PTPRB	rs2465811	S127G	missense variant	18361428/25537509	nr
PTPRB	rs2584021	D57N	missense variant	30826882/25537509	nr
PTPRB	rs582954	D1813D	synonymous variant	18361428	nr
PTPRB	rs61731914	M750I	missense variant		nr
PTPRB	rs61754227	R1446W	missense variant		nr
PTPRB	rs61758735	T1690I	missense variant	30724488/30073298	nr
PTPRB	rs7298147	G180S	missense variant		nr
PTPRB	rs80210207	Q904R	missense variant		nr
PTPRC	rs10919563		intron variant	19898481	nr
PTPRC	rs1164362432	S665R	missense variant	31848144	nr
PTPRC	rs12136658	H570Q	missense variant		VCV000138850.9	B
PTPRC	rs1485162890	D1000V	missense variant	31848144	nr
PTPRC	rs2230606	I296L	missense variant		VCV000138848.7	B
PTPRC	rs41269905	D123H	missense variant		VCV000138847.7	B
PTPRC	rs4915154	T193A	missense variant		VCV000464444.16	B/LB
PTPRC	rs746480752	P49T	missense variant	31848144	nr
PTPRC	rs79141749	N351S	missense variant		VCV000378445.7	B
PTPRD	-	C1428G	missense variant	28968711	nr
PTPRD	-	S1845fs*	frameshift variant	31088393	nr
PTPRD	rs2279776	G1418	synonymous variant	23069849	nr
PTPRD	rs10115782		intron variant	26181631	nr
PTPRD	rs1029089		intergenic	25994864	nr
PTPRD	rs10815873		intron variant	24454846	nr
PTPRD	rs10976737		intergenic	23903073	nr
PTPRD	rs10977015		intron variant	34046847	nr
PTPRD	rs10977171	Q447E	missense variant	26298793	VCV001240532.2	B
PTPRD	rs12003835		intron variant	31070104	nr
PTPRD	rs142871508		splice region variant,intron variant	26298793	VCV000723127.4	B
PTPRD	rs17584499		intron variant	29858661/33706321/29858661	nr
PTPRD	rs1934268		intron variant	30808802	nr
PTPRD	rs1975197		intron variant	29033051/26181631/26181631/26643377	nr
PTPRD	rs201582858	S1333N	missense variant		nr
PTPRD	rs2146180		intergenic	23903073	nr
PTPRD	rs2279776	G1418G	synonymous variant	23069849	nr
PTPRD	rs2296094		intron variant	29033051/26181631	nr
PTPRD	rs2381801		intron variant	29483675	nr
PTPRD	rs2381970		intron variant	26181631	nr
PTPRD	rs2475335		intron variant	29608257	nr
PTPRD	rs324498		intron variant	30237584	nr
PTPRD	rs35331017		intron variant	32726798	nr
PTPRD	rs35929428	R995C	missense variant	26298793	nr
PTPRD	rs4626664		intron variant	26181631/26643377	nr
PTPRD	rs560380		intron variant	28322283	nr
PTPRD	rs61733190	I885V	missense variant		nr
PTPRD	rs61733196	P1305L	missense variant		nr
PTPRD	rs72694737	T781A	missense variant	26298793	nr
PTPRD	rs7470838		intron variant	29033051/26181631	nr
PTPRD	rs747543296	W775*	stop gained,splice region variant	23800680	nr
PTPRD	rs767146958	T210I	missense variant	25765181	nr
PTPRD	rs7861684		intergenic	23903073	nr
PTPRD	rs7875560		intergenic	26314684	nr
PTPRE	rs78752313	T150S	missense variant		nr
PTPRF	rs1131692054	MCV614fs*	frameshift variant	24781087	VCV000155912.1	P
PTPRF	rs17849118	L1506V	missense variant	31642198	VCV000736511.3	LB
PTPRF	rs2782641		intron variant	18298487/17554300	nr
PTPRG	rs2292245	G574S	missense variant	23758498	nr
PTPRG	rs10490775		intron variant	25299301/20825314	nr
PTPRG	rs139041779	V426M	missense variant	25158255	nr
PTPRG	rs142366357	R323C	missense variant	26091878/27211562	nr
PTPRG	rs149885804	G523S	missense variant	26091878/27211562	nr
PTPRG	rs150212631	R1049Q	missense variant	26091878/27211562	nr
PTPRG	rs2292245	G574S	missense variant	23758498	nr
PTPRG	rs62620047	Y92H	missense variant		nr
PTPRG	rs704341		intron variant	26089329	nr
PTPRG	rs72878145	G838S	missense variant	26091878/27211562	nr
PTPRG	rs7609954		intron variant	26830138	nr
PTPRG	rs7640737		intron variant	23758498/20825314/23758498/25299301/23758498	nr
PTPRG	rs765128415	I837S	missense variant	26091878/27211562	nr
PTPRG	rs769041418	R422*	stop gained	26091878	nr
PTPRG	rs9870460	Q639R	missense variant		nr
PTPRH	rs116363585	G191R	missense variant		nr
PTPRH	rs147881000	Q887*	stop gained	28137300	nr
PTPRH	rs16986309	L543F	missense variant		nr
PTPRH	rs201517965	E200*	stop gained	28137300	nr
PTPRH	rs2288419	I1076V	missense variant		nr
PTPRH	rs2288515	H348Y	missense variant		nr
PTPRH	rs2288523	K781N	missense variant		nr
PTPRH	rs36092369	G831D	missense variant		nr
PTPRH	rs45493898	L226P	missense variant		nr
PTPRH	rs45535035	V243I	missense variant		nr
PTPRH	rs55870162	D232N	missense variant		nr
PTPRH	rs61734259	G951D	missense variant		nr
PTPRJ	-	I1013S	missense variant	29762926	nr
PTPRJ	-		splice variant	30591527
PTPRJ	rs11039554	I1235T	missense variant		VCV000789483.3	B
PTPRJ	rs1503185	R326Q	missense variant	30661225/19672627/22677127	nr
PTPRJ	rs151078858	T1091M	missense variant	33692975	nr
PTPRJ	rs1566734	Q276P	missense variant	23341091/19672627/30661225/22677127/27309885	VCV000008690.3	B
PTPRJ	rs2229701	A293T	missense variant/splice region variant		VCV000789482.3	B
PTPRJ	rs2229703	V372I	missense variant		nr
PTPRJ	rs2270992	T233T	synonymous variant	23341091	nr
PTPRJ	rs2270993	E206E	synonymous variant/splice region variant	23341091	nr
PTPRJ	rs4752904	E872D	synonymous variant	22677127/23341091/27309885	nr
PTPRJ	rs79602244	S635R	missense variant		VCV000718507.4	B
PTPRK	rs11753871		intergenic	28987514	nr
PTPRK	rs13204742		intergenic	27438997	nr
PTPRK	rs1341597		intron variant	28987514	nr
PTPRK	rs143992147	R784H	missense variant	22495309	nr
PTPRK	rs17055598		intron variant	28987514	nr
PTPRK	rs17245411		intron variant	28987514	nr
PTPRK	rs17461290		intron variant	28987514	nr
PTPRK	rs1891149		intron variant	28987514	nr
PTPRK	rs1891150		intron variant	28987514	nr
PTPRK	rs2326681		intron variant	28987514	nr
PTPRK	rs41514350		intron variant	28987514	nr
PTPRK	rs4895829		intron variant	28987514	nr
PTPRK	rs4897243		intron variant	28987514	nr
PTPRK	rs55743914		intron variant	23820479/25052311	nr
PTPRK	rs61757811	R1033S	missense variant/splice region variant		nr
PTPRK	rs72975913		intron variant	28983737	nr
PTPRK	rs72975916		intron variant	23820479	nr
PTPRK	rs802719		intergenic	28983737	nr
PTPRK	rs802734		intergenic	23820479	nr
PTPRK	rs9375546		intron variant	28987514	nr
PTPRM	rs199876491	V1356G	missense variant		nr
PTPRM	rs35224276	S39R	missense variant		VCV000773336.4	B
PTPRM	rs4798571		intron variant	22194214	nr
PTPRM	rs611625		3'downstream	30685201	nr
PTPRM	rs61737157	P1080A	missense variant		nr
PTPRM	rs7239623		3'downstream	30685201	nr
PTPRM	rs78021424		intron variant	32056145	nr
PTPRM	rs930926		3'downstream	30685201	nr
PTPRN	rs186464460	G11W	missense variant		nr
PTPRN	rs35314717	S419R	missense variant		nr
PTPRN2	rs10081191		intron variant	33242228	nr
PTPRN2	rs10245268		intron variant	31206606	nr
PTPRN2	rs1130495	S208P	missense variant		nr
PTPRN2	rs1130496	R213H	missense variant		nr
PTPRN2	rs1130499	S325T	missense variant		nr
PTPRN2	rs1257461683	I806V	missense variant	32172663	nr
PTPRN2	rs150508509	G323R	missense variant		VCV000787873.4	B
PTPRN2	rs1563273056	LA777fs*	frameshift variant	VCV000789293	nr
PTPRN2	rs1670344		intron variant	30890718	nr
PTPRN2	rs2091718		intron variant	35052758	nr
PTPRN2	rs2335845		intron variant	31206606	nr
PTPRN2	rs3752368	V343M	missense variant		nr
PTPRN2	rs3800855	S140T	missense variant		nr
PTPRN2	rs73745196	S247G	missense variant		VCV000780732.4	B
PTPRN2	rs78784885	E190K	missense variant		VCV000790837.4	B
PTPRO	-		splice variant	21722858
PTPRO	rs10846175		intron variant	27272414	nr
PTPRO	rs1234329276	T6A	missense variant	34546508	nr
PTPRO	rs61754411	N370K	missense variant	28199135	VCV001315691.4	B/LB
PTPRO	rs747573173	V593A	missense variant/splice region variant	34546508	nr
PTPRO	rs7976329		intron variant	27272414/32498977	nr
PTPRQ	-	R457G	missense variant	20346435	nr
PTPRQ	-	Q429*	stop gained	20472657	nr
PTPRQ	-	L8fs*	stop gained	25557914	nr
PTPRQ	-	T906fs*	frameshift variant	25557914	nr
PTPRQ	-	T1491M	missense variant	29849575	nr
PTPRQ	-	V658A	missense variant	29849575	nr
PTPRQ	-	D184fs*	stop gained	31379920	nr
PTPRQ	-	W2294*	stop gained	31655630/29309402	VCV000438482.2	P
PTPRQ	-	L353fs*	stop gained	33478437	nr
PTPRQ	-		splice variant	33997018
PTPRQ	rs10778752	V645D	missense variant		VCV000682569.9	B
PTPRQ	rs11114486	Q791K	missense variant		VCV001174737.8	B
PTPRQ	rs111994950	K2121N	missense variant		VCV001234566.3	B
PTPRQ	rs1163042	R2088K	missense variant		VCV000586390.3	B
PTPRQ	rs12579151	V830A	missense variant		VCV000805258.3	B
PTPRQ	rs1322366495	E1994G	missense variant	25919374	nr
PTPRQ	rs17713202	N1202D	missense variant		VCV001266012.2	B
PTPRQ	rs190166486	D1042G	missense variant	25919374	nr
PTPRQ	rs4482094	A286V	missense variant		VCV001268508.1	B
PTPRQ	rs57971665	R431Q	missense variant		VCV000511505.2	B
PTPRQ	rs60216135	T17I	missense variant		VCV000508618.2	B
PTPRQ	rs61729263	Y1492C	missense variant		VCV000805261.2	B
PTPRQ	rs61729278	I1014V	missense variant		VCV000805259.4	B
PTPRQ	rs61729287	Q429E	missense variant		VCV000514105.4	B
PTPRQ	rs6539524	F1056L	missense variant		VCV001175148.8	B
PTPRQ	rs78857302	T33I	missense variant		VCV000508621.2	B
PTPRQ	rs7963963	I1692T	missense variant		VCV000586389.3	B
PTPRQ	rs7965277	V819G	missense variant/splice region variant		VCV001174906.7	B
PTPRQ	rs7975340	A1078P	missense variant		VCV000805260.2	B
PTPRR	rs11178469		intron variant	34122509/29808027	nr
PTPRR	rs1513105		intron variant	22100128	nr
PTPRR	rs35387004	V386I	missense variant		nr
PTPRR	rs35390084	V439I	missense variant		nr
PTPRR	rs3803036	K314I/R	missense variant	23422819	nr
PTPRR	rs61742543	Q636K	missense variant		nr
PTPRR	rs73341069	V239I	missense variant	26604137	nr
PTPRS	-	S1104G	missense variant	28767323	nr
PTPRS	rs1143699	D1763D	synonymous variant	17893260	nr
PTPRS	rs139333331		intron variant	28767323	nr
PTPRS	rs17130		intron variant	17614280	nr
PTPRS	rs1978237		intron variant	17893260	nr
PTPRS	rs2230610	A991V	missense variant		nr
PTPRS	rs4807015		intron variant	17893260	nr
PTPRS	rs4807751		noncoding	28767323	nr
PTPRS	rs55646775		intron variant	28767323	nr
PTPRS	rs61729772	G1674C	missense variant		nr
PTPRS	rs61729778	R929C	missense variant		nr
PTPRS	rs61729780	V433E	missense variant		nr
PTPRS	rs8100586		intron variant	17614280	nr
PTPRS	rs886936		intron variant	17614280	nr
PTPRT	rs11086843		intron variant	18668548	nr
PTPRT	rs111968843		intron variant	31667592	nr
PTPRT	rs117602254		intron variant	34683173	nr
PTPRT	rs17811401	M76V	missense variant		nr
PTPRT	rs199947379	T1346M	missense variant	24123876	VCV000092127.1	US
PTPRT	rs2866943		3 prime UTR variant	25967969	nr
PTPRT	rs2867655	A29P	missense variant		nr
PTPRT	rs490514		intron variant	26283027	nr
PTPRT	rs6029959		3 prime UTR variant	25967969	nr
PTPRT	rs6030462		intron variant	34707478	nr
PTPRT	rs6124419		intron variant	31667592	nr
PTPRT	rs61741566	V1127G	missense variant		nr
PTPRT	rs61749502	A813T	missense variant		VCV000769092.4	B
PTPRT	rs73909220	V933L	missense variant		VCV000769091.4	B
PTPRT	rs762135776	V69A	missense variant	26539891	VCV000402165.1	LP
PTPRT	rs768757373	R183Q	missense variant		VCV000996595.1	A
PTPRU	rs10914351		intergenic	25109461	nr
PTPRU	rs2235937	N930S	missense variant		nr
PTPRU	rs35332573	T60N	missense variant		nr
PTPRU	rs540351799	M1389L	missense variant		VCV000599584.1	LP
PTPRU	rs559788899	P844L	missense variant		VCV000599583.1	LP
PTPRU	rs61729921	V833F	missense variant		nr
PTPRZ1	rs1147502		intron variant	17579610	nr
PTPRZ1	rs1147504	G1433D/V	missense variant	25445010	nr
PTPRZ1	rs1196471		intron variant	17579610	nr
PTPRZ1	rs1196513		intron variant	17579610	nr
PTPRZ1	rs11980387	R6H	missense variant		nr
PTPRZ1	rs12154537		intron variant	34081644	nr
PTPRZ1	rs13241278		intron variant	17579610	nr
PTPRZ1	rs1918031		intron variant	34081644	nr
PTPRZ1	rs539780818	V389L	missense variant		nr
PTPRZ1	rs61732005	D1384N	missense variant		nr
PTPRZ1	rs62639684	G1425D	missense variant		nr
PTPRZ1	rs6466808		intron variant	34081644	nr
PTPRZ1	rs6466810		intron variant	34081644	nr
PTPRZ1	rs6955395		intron variant	34081644	nr
PTPRZ1	rs740965	I3S	missense variant		nr
